# Supplementary material for: Effects of Temperature and Density on House Cricket Survival and Growth and on the Prevalence of Acheta Domesticus Densovirus
Source: MDPI journal article supplement (doi:10.3390/insects14070588), 2023-06-29
Supplement: s1 [file s1]

## Supplementary figures

**Table S1.** Analysis of variance (ANOVA) output tables for the three experimental runs on relative viral abundance data.

| Experimental run 1 |    | Analysis of variance |        |       |         |
|--------------------|----|----------------------|--------|-------|---------|
|                    | Df | SS                   | MS     | F     | p-value |
| Temp               | 2  | 12.87                | 6.437  | 3.509 | 0.0405  |
| Dens               | 2  | 0.9                  | 0.448  | 0.244 | 0.7845  |
| Temp:Dens          | 4  | 12.73                | 3.184  | 1.736 | 0.1635  |
| Residuals          | 36 | 66.03                | 1.834  |       |         |
| Experimental run 2 |    | Analysis of variance |        |       |         |
|                    | Df | SS                   | MS     | F     | p-value |
| Temp               | 2  | 0.61                 | 0.306  | 0.176 | 0.8391  |
| Dens               | 2  | 5.67                 | 2.835  | 1.635 | 0.2092  |
| Temp:Dens          | 4  | 15.38                | 3.845  | 2.217 | 0.0866  |
| Residuals          | 36 | 62.44                | 1.734  |       |         |
| Experimental run 3 |    | Analysis of variance |        |       |         |
|                    | Df | SS                   | MS     | F     | p-value |
| Temp               | 2  | 25.34                | 12.671 | 7.151 | 0.00243 |
| Dens               | 2  | 22.16                | 11.080 | 6.253 | 0.00467 |
| Temp:Dens          | 4  | 5.04                 | 1.259  | 0.710 | 0.59016 |
| Residuals          | 36 | 63.79                | 1.772  |       |         |

**Table S2.** P values for the pairwise comparisons for the biomass data.

| P =      | 25C°<br>D10 | 25C°<br>D20 | 25C°<br>D40 | 30C°<br>D10 | 30C°<br>D20 | 30C°<br>D40 | 35C°<br>D10 | 35C°<br>D20 | 35C°<br>D40 |
|----------|-------------|-------------|-------------|-------------|-------------|-------------|-------------|-------------|-------------|
| 25C° D10 |             | <.0001      | <.0001      | 0.0002      | <.0001      | <.0001      | 0.0004      | <.0001      | <.0001      |
| 25C° D20 |             |             | <.0001      | <.0001      | 0.0098      | <.0001      | <.0001      | 0.0375      | <.0001      |
| 25C° D40 |             |             |             | <.0001      | <.0001      | 0.1112      | <.0001      | <.0001      | 0.4317      |
| 30C° D10 |             |             |             |             | <.0001      | <.0001      | 1.0000      | <.0001      | <.0001      |
| 30C° D20 |             |             |             |             |             | <.0001      | <.0001      | 1.0000      | <.0001      |
| 30C° D40 |             |             |             |             |             |             | <.0001      | <.0001      | 0.9988      |
| 35C° D10 |             |             |             |             |             |             |             | <.0001      | <.0001      |
| 35C° D20 |             |             |             |             |             |             |             |             | <.0001      |

**Table S3.** Survival, harvested biomass and individual weight of house crickets reared at nine combinations of temperatures and densities.

| <b>Treatment</b> | <b>Survival (%)<br/>(±SE)</b> | <b>Mean harvested<br/>biomass (mg)<br/>(±SE)</b> | <b>Mean female<br/>weight (mg)<br/>(±SE)</b> | <b>Mean male<br/>weight (mg)<br/>(±SE)</b> |
|------------------|-------------------------------|--------------------------------------------------|----------------------------------------------|--------------------------------------------|
| 25C° D10         | 79.3 (±7)                     | 2114.467 (±5)                                    | 273 (±7.22)                                  | 246 (±6.23)                                |
| 25C° D20         | 83.0 (±5)                     | 4442.133 (±4.29)                                 | 294 (±6.57)                                  | 241 (±4.42)                                |
| 25C° D40         | 83.3 (±4)                     | 8834.267 (±2.85)                                 | 283 (±4.12)                                  | 244 (±3.4)                                 |
| 30C° D10         | 81.3 (±7)                     | 2832.400 (±7.59)                                 | 389 (±10.88)                                 | 315 (±8.69)                                |
| 30C° D20         | 78.3 (±5)                     | 5553.400 (±5.71)                                 | 400 (±7.44)                                  | 308 (±6.26)                                |
| 30C° D40         | 77.0 (±4)                     | 10491.133 (±4.02)                                | 391 (±6.44)                                  | 301 (±3.53)                                |
| 35C° D10         | 84.7 (±8)                     | 2785.933 (±5.55)                                 | 359 (±8.02)                                  | 302 (±6.02)                                |
| 35C° D20         | 82.7 (±5)                     | 5408.000 (±4.4.)                                 | 364 (±5.21)                                  | 279 (±4.3)                                 |
| 35C° D40         | 79.0 (±4)                     | 10065.467 (±3.56)                                | 351 (±4.66)                                  | 270 (±3.45)                                |



**Table S5.:** Pairwise comparison data for male body weight.

[illegible]
